# Supplementary material
Source: PubMed Central journal article supplement (PMC5838602)
Supplement: jamacardiol-3-114-s001.pdf [file jamacardiol-3-114-s001.pdf]

## Supplementary Online Content

Likosky DS, Van Parys J, Zhou W, Borden WB, Weinstein MC, Skinner JS.  
Association between Medicare expenditure growth and mortality rates in patients  
with acute myocardial infarction: a comparison from 1999 through 2014. *JAMA  
Cardiol*. Published online December 20, 2017.  
doi:10.1001/jamacardio.2017.4771

### **eAppendix.** Sensitivity Analysis

**eTable 1.** Association Between Early Percutaneous Coronary Intervention and  
180-day Acute Myocardial Infarction Mortality, Stratified By Type of Acute  
Myocardial Infarction

**eTable 2.** Components of Spending Across Quartiles of Hospital Early  
Percutaneous Coronary Intervention Change, 1999-2014

**eTable 3.** Association Between Early Percutaneous Coronary Intervention and  
180-day Acute Myocardial Infarction Mortality

**eTable 4.** The Return to Early PCI in High vs Low Volume Hospitals

This supplementary material has been provided by the authors to give readers  
additional information about their work.

## **eAppendix.** Sensitivity Analyses

We stratified our primary analysis by the AMI location in the heart: (1) STEMI MIs, which are approximated by anterolateral, anterior wall, inferolateral, inferior wall, infero-posterolateral, true posterior, and not otherwise specified locations, and (2) NSTEMI MIs, approximated by subendocardial location. Changes in early PCI were inversely associated with 180-day mortality, **eTable 3**. The association between early PCI growth and the 180-day mortality decline was larger among STEMI (beta = -0.172,  $p < 0.0014$ ) than NSTEMI patients (beta = -0.0917,  $p < 0.0014$ ), **Table 1**. Results were similar for 30-day mortality rates (**eTable 1**).

**eTable 1.** Association Between Early Percutaneous Coronary Intervention and 180-day Acute Myocardial Infarction Mortality, Stratified by Type of Acute Myocardial Infarction

| <b>Full Sample: N=668,486</b>                       | <b>30d mort</b> | <b>180d mort</b> | <b>31-180d mort</b> |
|-----------------------------------------------------|-----------------|------------------|---------------------|
| Early PCI Rate                                      | -0.033**        | -0.068**         | -0.034**            |
|                                                     | -0.0066         | -0.0093          | -0.0061             |
|                                                     | [0.000]         | [0.000]          | [0.000]             |
| Log(Mean Total 180-day \$)                          | -0.003          | -0.012*          | -0.009**            |
|                                                     | -0.0036         | -0.0049          | -0.0033             |
|                                                     | [0.479]         | [0.013]          | [0.005]             |
| <b>NSTEMI Sample: N=455,389</b>                     | <b>30d mort</b> | <b>180d mort</b> | <b>31-180d mort</b> |
| Early PCI Rate                                      | -0.041**        | -0.081**         | -0.040**            |
|                                                     | -0.0084         | -0.0121          | -0.009              |
|                                                     | [0.000]         | [0.000]          | [0.000]             |
| Log(Mean Total 180-day \$)                          | -0.004          | -0.012*          | -0.007              |
|                                                     | -0.0034         | -0.0051          | -0.0038             |
|                                                     | [0.230]         | [0.018]          | [0.052]             |
| <b>STEMI Sample: N=213,097</b>                      | <b>30d mort</b> | <b>180d mort</b> | <b>31-180d mort</b> |
| Early PCI Rate                                      | -0.118**        | -0.156**         | -0.032**            |
|                                                     | -0.0078         | -0.0097          | -0.0049             |
|                                                     | [0.000]         | [0.000]          | [0.000]             |
| Log(Mean Total 180-day \$)                          | -0.007          | -0.020**         | -0.011**            |
|                                                     | -0.0049         | -0.0058          | -0.0028             |
|                                                     | [0.172]         | [0.001]          | [0.000]             |
| m                                                   | 2               |                  |                     |
| * for 5% significance level, Bonferroni correction  | p ≤ 0.025       |                  |                     |
| ** for 1% significance level, Bonferroni correction | p ≤ 0.005       |                  |                     |

<sup>a</sup>Each column within each panel is a separate regression.

<sup>b</sup>PCI is percutaneous coronary intervention.

<sup>c</sup>Outcome variables are 30 day mortality, 180 day mortality, and 31-180 day mortality.

<sup>d</sup>31-180-day mortality is conditional on surviving to 30 days.

<sup>e</sup>Logit model estimated; marginal effects reported using "margins, atmeans" in Stata.

<sup>f</sup>All regressions control for patient characteristics, hospital fixed effects, and year fixed effects.

<sup>g</sup>Includes years 1999, 2000, 2004, 2008, 2013, and Q1-Q2 2014.

<sup>h</sup>Early PCI rate and Log(Mean Total 180-day Spending) are at the hospital-level.

<sup>i</sup>Early PCI means receiving PCI within a day of admission.

<sup>j</sup>Log(Mean Total 180-day Spending) are calculated using patients who live 180-days.

<sup>k</sup>Standard errors are clustered at the hospital-level and are reported in parentheses.

*P* values are in brackets.

**eTable 2.** Components of Spending Across Quartiles of Hospital Early Percutaneous Coronary Intervention Change, 1999-2014

|                          | Change in 180d Early PCI Rates (2013/2014 vs 1999/2000) |              |              |              | Difference 4 <sup>th</sup> vs. 1 <sup>st</sup> Quartile |
|--------------------------|---------------------------------------------------------|--------------|--------------|--------------|---------------------------------------------------------|
|                          | 1st Quartile                                            | 2nd Quartile | 3rd Quartile | 4th Quartile |                                                         |
| Part A                   | \$(1,398)                                               | \$(1,335)    | \$(1,286)    | \$(1,642)    | \$(244)                                                 |
| Cardiac Procedures       | \$752                                                   | \$678        | \$725        | \$855        | \$103                                                   |
| Other Procedures         | \$666                                                   | \$576        | \$535        | \$498        | \$(168)                                                 |
| HHA/Hospice/DME          | \$1,107                                                 | \$1,003      | \$841        | \$809        | \$(298)                                                 |
| Skilled Nursing Facility | \$2,013                                                 | \$1,717      | \$1,548      | \$1,313      | \$(700)                                                 |
| Testing                  | \$160                                                   | \$183        | \$179        | \$210        | \$50                                                    |
| Visits                   | \$583                                                   | \$509        | \$460        | \$473        | \$(110)                                                 |
| Early PCI rate           | 1.09                                                    | 12.81        | 21.20        | 33.05        | \$32                                                    |

<sup>a</sup>Quartiles based on absolute differences in hospital use of early PCI rates between 2013/2014 and 1999/2000.

<sup>b</sup>HHA = Home Health Agency, DME = Durable Medical Equipment.

<sup>c</sup>PCI = Percutaneous Coronary Intervention.

<sup>d</sup>Early PCI means receiving PCI within a day of admission.

**eTable 3.** Association Between Early Percutaneous Coronary Intervention and 180-day Acute Myocardial Infarction Mortality

| <b>Outcome Variable:</b>                       | <b>-1</b>          | <b>-2</b>          | <b>-3</b>          |
|------------------------------------------------|--------------------|--------------------|--------------------|
| <b>180-day Mortality</b>                       | <b>Full Sample</b> | <b>Full Sample</b> | <b>Full Sample</b> |
| Early PCI Rate                                 | -0.066**           | -0.078**           | -0.078**           |
|                                                | -0.0094            | -0.0096            | -0.009             |
|                                                | [0.000]            | [0.000]            | [0.000]            |
| Any CABG Rate                                  | 0.029              | 0.005              |                    |
|                                                | -0.0129            | -0.0139            |                    |
|                                                | [0.024]            | [0.696]            |                    |
| Mean Total 180-day (\$1000)                    | -0.0004*           |                    |                    |
|                                                | -0.0001            |                    |                    |
|                                                | [0.006]            |                    |                    |
| Mean 180-day Testing (\$1000)                  |                    | -0.004             | -0.004             |
|                                                |                    | -0.0027            | -0.0027            |
|                                                |                    | [0.133]            | [0.122]            |
| Mean 180-day Visits (\$1000)                   |                    | -0.004             | -0.004             |
|                                                |                    | -0.0023            | -0.0027            |
|                                                |                    | [0.072]            | [0.053]            |
| Mean 180-day Cardiac Procedures (\$1000)       |                    | 0.004              | 0.004              |
|                                                |                    | -0.0016            | -0.0016            |
|                                                |                    | [0.011]            | [0.008]            |
| Mean 180-day Other Procedures (\$1000)         |                    | -0.004             | -0.004             |
|                                                |                    | -0.0018            | -0.0017            |
|                                                |                    | [0.020]            | [0.017]            |
| Mean 180-day Part A Spending (\$1000)          |                    | 0.0002             | 0.0002             |
|                                                |                    | -0.0003            | -0.0002            |
|                                                |                    | [0.544]            | [0.392]            |
| Mean 180-day Post-Acute Care (\$1000)          |                    | -0.0021**          |                    |
|                                                |                    | -0.0002            |                    |
|                                                |                    | [0.000]            |                    |
| Mean 180-day Skilled Nursing Facility (\$1000) |                    |                    | -0.0024**          |
|                                                |                    |                    | -0.0006            |
|                                                |                    |                    | [0.000]            |
| Mean 180-day Home Health Agency (\$1000)       |                    |                    | -0.0014            |
|                                                |                    |                    | -0.0015            |
|                                                |                    |                    | [0.377]            |

|                                                     |                    |                    |                    |
|-----------------------------------------------------|--------------------|--------------------|--------------------|
| Mean 180-day Hospice (\$1000)                       |                    |                    | -0.0022            |
|                                                     |                    |                    | -0.0019            |
| <b>Outcome Variable:</b>                            | <b>-1</b>          | <b>-2</b>          | <b>-3</b>          |
| <b>180-day Mortality</b>                            | <b>Full Sample</b> | <b>Full Sample</b> | <b>Full Sample</b> |
|                                                     |                    |                    | [0.253]            |
| Mean 180-day Durable Medical Equipment (\$1000)     |                    |                    | 0.0004             |
|                                                     |                    |                    | -0.0043            |
|                                                     |                    |                    | [0.924]            |
| N                                                   | 479,893            | 479,893            | 479,893            |
| m                                                   | 3                  | 8                  | 10                 |
| * for 5% significance level, Bonferroni correction  | p < 0.017          | p < 0.00625        | p < 0.005          |
| ** for 1% significance level, Bonferroni correction | p < 0.0033         | p < 0.00125        | p < 0.001          |

<sup>a</sup>Each column is a separate regression.

<sup>b</sup>PCI is percutaneous coronary intervention, CABG is coronary artery bypass grafting. Early PCI occurs on the same day as the admission.

<sup>c</sup>Logit model estimated; marginal effects reported using "margins, atmeans" in Stata.

<sup>d</sup>All regressions control for patient characteristics, hospital fixed effects, and year fixed effects.

<sup>e</sup>All spending measures are calculated for each hospital-year using patients who live 6 months.

<sup>f</sup>Includes years 1999, 2000, 2004, 2008, 2013, and Q1-Q2 2014.

<sup>g</sup>Standard errors are clustered at the hospital-level and are reported in parentheses.

<sup>h</sup>P values are in brackets.

**eTable 4.** The Return to Early PCI in High vs Low Volume Hospitals

| <b>Outcome Variable:</b>                                 | <b>(1)</b>         | <b>(2)</b>    | <b>(3)</b>   |
|----------------------------------------------------------|--------------------|---------------|--------------|
| <b>180-day Mortality</b>                                 | <b>Full Sample</b> | <b>NSTEMI</b> | <b>STEMI</b> |
| Early PCI Rate*Q1 Hospital Volume                        | -0.0455**          | -0.0505*      | -0.1470**    |
|                                                          | (0.0126)           | (0.0192)      | (0.0129)     |
|                                                          | [0.000]            | [0.009]       | [0.000]      |
| Early PCI Rate*Q2 Hospital Volume                        | -0.0700**          | -0.0907**     | -0.1507**    |
|                                                          | (0.0158)           | (0.0192)      | (0.0150)     |
|                                                          | [0.000]            | [0.000]       | [0.000]      |
| Early PCI Rate*Q3 Hospital Volume                        | -0.0863**          | -0.0855**     | -0.1680**    |
|                                                          | (0.0158)           | (0.0224)      | (0.0144)     |
|                                                          | [0.000]            | [0.000]       | [0.000]      |
| Early PCI Rate*Q4 Hospital Volume                        | -0.0998**          | -0.1396**     | -0.1690**    |
|                                                          | (0.0184)           | (0.0289)      | (0.0180)     |
|                                                          | [0.000]            | [0.000]       | [0.000]      |
| Mean Total 6-Month (\$1000)                              | -0.0003            | -0.0002       | -0.0002      |
|                                                          | (0.0001)           | (0.0001)      | (0.0001)     |
|                                                          | [0.018]            | [0.115]       | [0.090]      |
| p-value from F-test: beta1=beta4                         | 0.0067             | 0.0075        | 0.2061       |
| N                                                        | 479,873            | 331,635       | 148,077      |
| m                                                        | 5                  | 5             | 5            |
| * for 5% significance level using Bonferroni correction  | p < 0.01           | p < 0.01      | p < 0.01     |
| ** for 1% significance level using Bonferroni correction | p < 0.002          | p < 0.002     | p < 0.002    |

<sup>a</sup>Each column is a separate regression.

<sup>b</sup>Sample includes patients who visited hospitals that appeared in the data in all years and that treated  $\geq 10$  AMI patients per year.

<sup>c</sup>Logit model estimated; marginal effects reported using "margins, dydx() atmeans" in Stata.

<sup>d</sup>All regressions control for patient characteristics, hospital fixed effects, and year fixed effects.

<sup>e</sup>All spending measures are calculated for each hospital-year using patients who live 180-days.

<sup>f</sup>Includes years 1999, 2000, 2004, 2008, 2013, and Q1-Q2 2014.

<sup>g</sup>Standard errors are clustered at the hospital-level and are reported in parentheses.

<sup>h</sup>P values are in brackets.
